# Supplementary material
Source: publisher figshare collection journal article supplement (https://acs.figshare.com/ndownloader/files/13238639)
Supplement: Supplementary file 1 [file 13238639]

# Supporting Information

## **Synthesis of short-chain-length and medium-chain-length polyhydroxyalkanoate blends from activated sludge by manipulating octanoic acid and nonanoic acid as carbon sources**

Zheng Chen<sup>1,2,3,4</sup>, Chuanpan Zhang<sup>1</sup>, Liang Shen<sup>1</sup>, Heng Li<sup>2</sup>, Yajuan Peng<sup>1</sup>, Haitao Wang<sup>1</sup>, Ning He<sup>1</sup>, Qingbiao Li<sup>1,5</sup>, Yuanpeng Wang<sup>1,\*</sup>

<sup>1</sup>Department of Chemical and Biochemical Engineering, College of Chemistry and Chemical Engineering, Xiamen University, Xiamen 361001, People's Republic of China

<sup>2</sup>Department of Environmental Science, School of Environmental Science and Engineering, Tan Kah Kee College, Xiamen University, Zhangzhou 363105, People's Republic of China

<sup>3</sup>Zhejiang Provincial Key Laboratory of Watershed Science and Health, Wenzhou Medical University, Wenzhou 325035, People's Republic of China

<sup>4</sup>Key Laboratory of Measurement and Control System for Coastal Environment, Fuqing Branch of Fujian Normal University, Fuqing 350300, People's Republic of China

<sup>5</sup>College of Food and Biological Engineering, Jimei University, Xiamen 361021, People's Republic of China

**3 Pages**

**2 Supporting tables**

---

\*Corresponding author:

Department of Chemical and Biochemical Engineering, College of Chemistry and Chemical Engineering, Xiamen University, No. 422, Southern Siming Road, Xiamen 361005, China.

E-mail address: [wyp@xmu.edu.cn](mailto:wyp@xmu.edu.cn) (Y. Wang)

**Table S1**  $^{13}\text{C}$  NMR chemical shifts of 3-hydroxyalkanoate (ppm).

| Carbon<br>site | scl-PHAs |        | mcl-PHAs |        |        |        |
|----------------|----------|--------|----------|--------|--------|--------|
|                | 3HB      | 3HV    | 3HHx     | 3HHp   | 3HO    | 3HN    |
| C1             | 169.1    | 169.36 | 169.36   | 169.36 | 169.36 | 169.36 |
| C2             | 40.74    | –      | 39.05    | 39.05  | 39.05  | 39.05  |
| C3             | 67.56    | 71.83  | 70.54    | 70.79  | 70.79  | 70.79  |
| C4             | 19.72    | –      | 35.85    | 33.44  | 33.71  | 33.71  |
| C5             |          | 9.26   | 18.27    | 27.11  | 24.66  | 24.96  |
| C6             |          |        | 13.75    | 22.37  | 31.47  | 28.98  |
| C7             |          |        |          | 13.87  | 22.44  | 31.64  |
| C8             |          |        |          |        | 13.92  | 22.51  |
| C9             |          |        |          |        |        | 13.99  |

Note: The symbols of “–” indicate that no signal peaks responding to the C2 and C4 in  $^{13}\text{C}$  NMR spectrum are detected because very low content of 3HV has been extracted from active sludge.

1 **Table S2** GC-MS analysis of methyl esterified samples PHAs produced from active sludge under aerobic condition at 30 °C.

| Peak | Retention<br>time (min) | m/z                                                  | Molecular<br>weight | Methyl esterified PHA<br>monomer structure | Similarity<br>index (%) |
|------|-------------------------|------------------------------------------------------|---------------------|--------------------------------------------|-------------------------|
| P1   | 2.725                   | 25, 29, 43, 59, 74, 87, 103, 119, 133, 149, 179      | 118                 | Methyl ester of 3HB                        | 95                      |
| P2   | 3.833                   | 26, 31, 43, 59, 71, 85, 103, 114, 131                | 132                 | Methyl ester of 3HV                        | 91                      |
| P3   | 5.183                   | 26, 41, 43, 61, 71, 97, 103, 113, 128, 145           | 146                 | Methyl ester of 3HHx                       | 84                      |
| P4   | 6.752                   | 27, 41, 43, 61, 74, 85, 103, 113, 127, 142, 159      | 160                 | Methyl ester of 3HHp                       | 88                      |
| P5   | 8.283                   | 27, 41, 43, 61, 74, 96, 103, 125, 141, 156, 173      | 174                 | Methyl ester of 3HO                        | 89                      |
| P6   | 9.725                   | 27, 41, 43, 61, 74, 96, 103, 113, 139, 155, 170, 187 | 188                 | Methyl ester of 3HN                        | 90                      |

2
